# Supplementary material
Source: Springer Nature journal article supplement (https://www.springermedizin.de/resource/supplementary/12974_2011_488_MOESM4_ESM.pdf/9601402)

**A***Body Weight*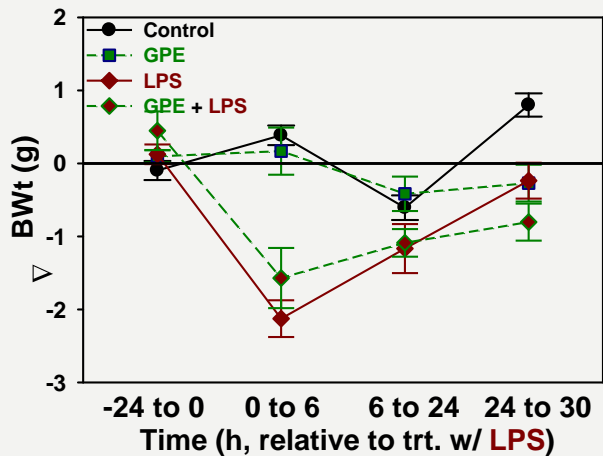**B***Food Intake*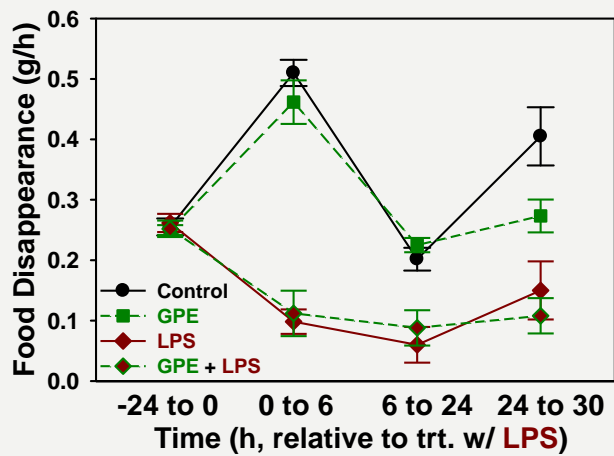**C***Locomotor Activity*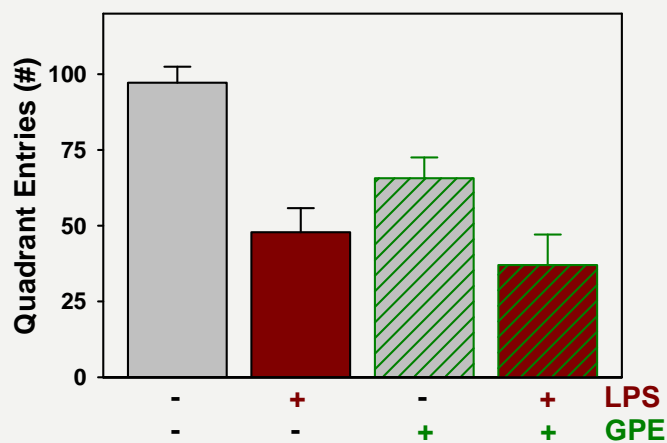**D***Forced Swim Test*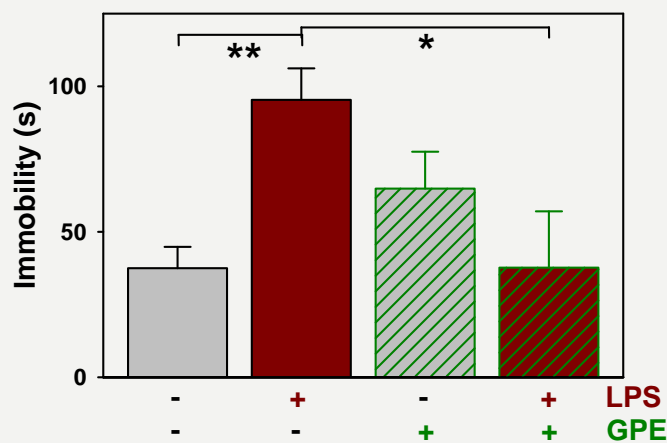**F***Sucrose Preference*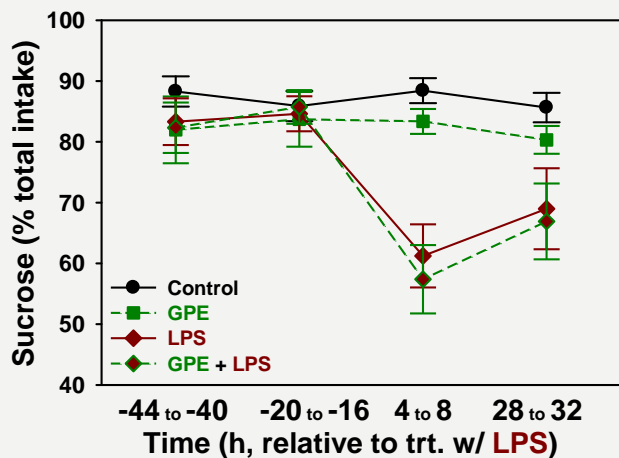

Supplement: MOESM4 [file 9601402]
